# Supplementary material
Source: Springer Nature journal article supplement (https://www.springermedizin.de/resource/supplementary/12879_2013_4196_MOESM2_ESM.pdf/9445116)

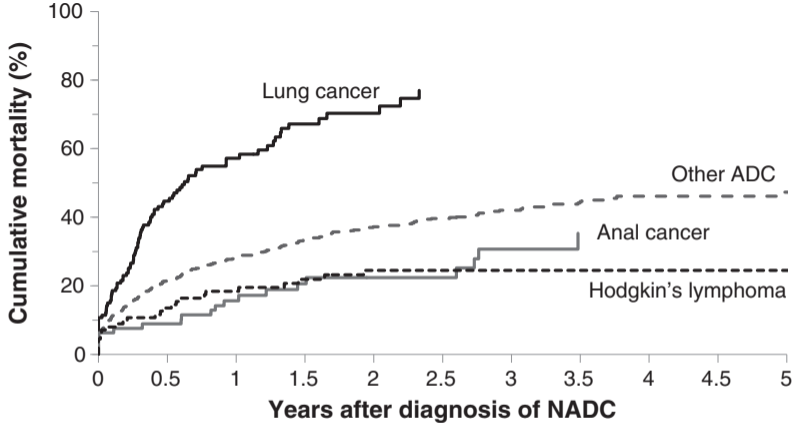

Number at risk

|                    |     |     |     |     |     |     |     |    |    |    |    |
|--------------------|-----|-----|-----|-----|-----|-----|-----|----|----|----|----|
| Lung cancer        | 140 | 69  | 35  | 24  | 14  | 10  |     |    |    |    |    |
| Anal cancer        | 79  | 69  | 56  | 45  | 38  | 30  | 21  | 13 |    |    |    |
| Hodgkin's lymphoma | 112 | 90  | 75  | 65  | 55  | 47  | 38  | 28 | 19 | 12 | 9  |
| Other NADC         | 549 | 416 | 327 | 269 | 211 | 175 | 121 | 83 | 58 | 39 | 29 |

Supplement: MOESM2 [file 9445116]
